# Supplementary material for: Evaluating the association of common APOA2 variants with type 2 diabetes
Source: PubMed Central journal article supplement (PMC2650681; doi:10.1186/1471-2350-10-13), 2009-02-13

# rs6413453

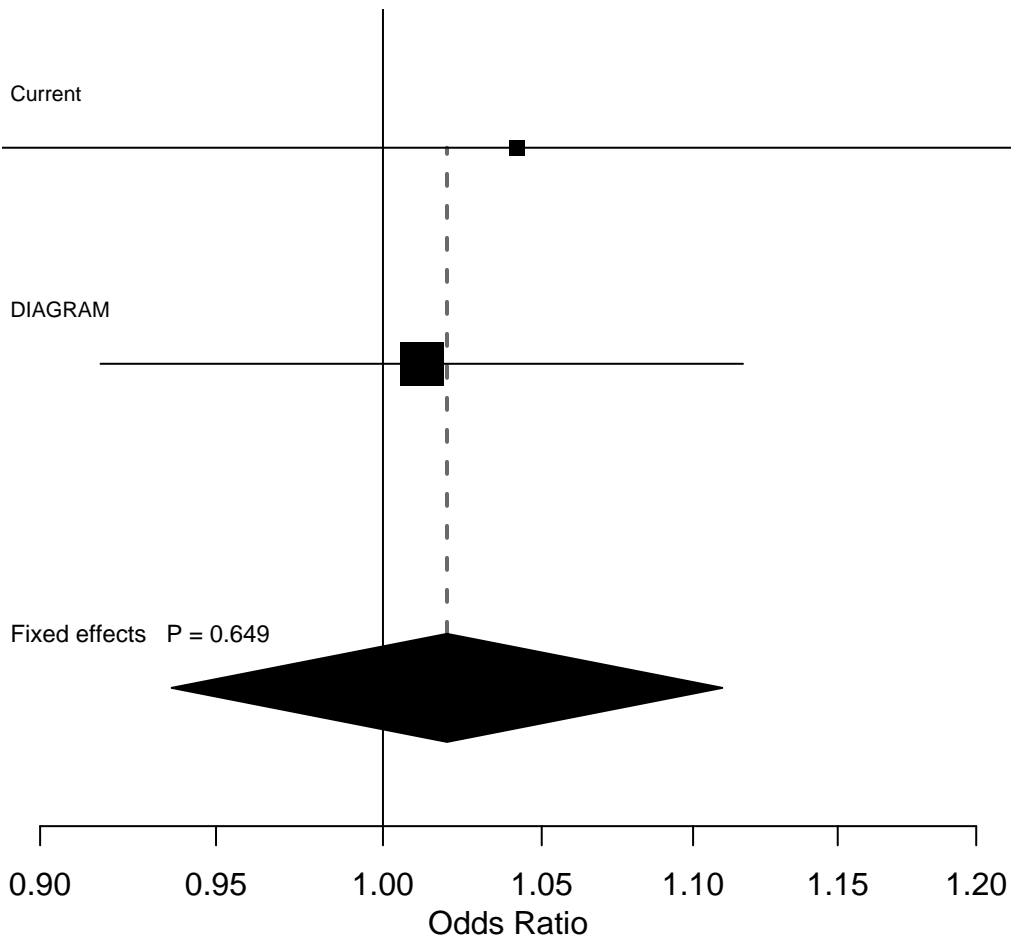

Supplement: 1471-2350-10-13-S2.pdf [file 1471-2350-10-13-S2.pdf]
